# Supplementary material for: Psoriasis and Its Impact on In-Hospital Outcome in Patients Hospitalized with Acute Kidney Injury
Source: MDPI journal article supplement (doi:10.3390/jcm9093004), 2020-09-17
Supplement: s1 [file s1]

## Supplementary Materials

**Table S1.** Baseline characteristics, treatment and outcome of patients with acute kidney injury and psoriasis stratified by survival status (cumulative data of the years 2005-2016).

| Parameters                                            | AKI +<br>Psoriasis<br>( <i>n</i> = 11,985) | Non-Survivors<br>( <i>n</i> = 2,645;<br>22.1%) | Survivors<br>( <i>n</i> = 9,340; 77.9%) | <i>p</i> -<br>value |
|-------------------------------------------------------|--------------------------------------------|------------------------------------------------|-----------------------------------------|---------------------|
| Age (years)                                           | 70 (60-78)                                 | 71 (61-78)                                     | 70 (60-78)                              | <0.001              |
| Sex (female)                                          | 4750 (39.6%)                               | 980 (37.1%)                                    | 3770 (40.4%)                            | 0.002               |
| Obesity                                               | 2312 (19.3%)                               | 424 (16.0%)                                    | 1888 (20.2%)                            | <0.001              |
| <b>Comorbidities</b>                                  |                                            |                                                |                                         |                     |
| Coronary artery disease                               | 3204 (26.7%)                               | 716 (27.1%)                                    | 2488 (26.6%)                            | 0.655               |
| Malignancy                                            | 1463 (12.2%)                               | 492 (18.6%)                                    | 971 (10.4%)                             | <0.001              |
| Heart failure                                         | 4508 (37.6%)                               | 1140 (43.1%)                                   | 3368 (36.1%)                            | <0.001              |
| COPD                                                  | 2175 (18.1%)                               | 504 (19.1%)                                    | 1671 (17.9%)                            | 0.170               |
| Diabetes mellitus                                     | 5099 (42.5%)                               | 1062 (40.2%)                                   | 4073 (43.2%)                            | 0.005               |
| Essential arterial hypertension                       | 6102 (50.9%)                               | 1182 (44.7%)                                   | 4920 (52.7%)                            | <0.001              |
| Atrial fibrillation/-flutter                          | 3660 (30.5%)                               | 930 (35.2%)                                    | 2730 (29.2%)                            | <0.001              |
| Deep vein thrombosis                                  | 274 (2.3%)                                 | 49 (1.9%)                                      | 225 (2.4%)                              | 0.107               |
| CRI 1                                                 | 267 (2.2%)                                 | 53 (2.0%)                                      | 214 (2.3%)                              | 0.411               |
| CRI 2                                                 | 709 (5.9%)                                 | 129 (4.9%)                                     | 580 (6.2%)                              | 0.011               |
| CRI 3                                                 | 2380 (19.9%)                               | 384 (14.5%)                                    | 1996 (21.4%)                            | <0.001              |
| CRI 4                                                 | 971 (8.1%)                                 | 210 (7.9%)                                     | 761 (8.1%)                              | 0.745               |
| CRI 5                                                 | 490 (4.1%)                                 | 109 (4.1%)                                     | 381 (4.1%)                              | 0.915               |
| <b>Dialysis and type of procedure</b>                 |                                            |                                                |                                         |                     |
| Dialysis general                                      | 1956 (16.3%)                               | 759 (28.7%)                                    | 1197 (12.8%)                            | <0.001              |
| Haemofiltration                                       | 453 (3.8%)                                 | 240 (9.1%)                                     | 213 (2.3%)                              | <0.001              |
| Haemodialyse                                          | 1684 (14.1%)                               | 606 (22.9%)                                    | 1078 (11.5%)                            | <0.001              |
| Haemodiafiltration                                    | 554 (4.6%)                                 | 292 (52.7%)                                    | 262 (2.8%)                              | <0.001              |
| <b>Serious adverse events through hospitalization</b> |                                            |                                                |                                         |                     |
| Gastro-intestinal bleeding                            | 509 (4.2%)                                 | 168 (6.4%)                                     | 341 (3.7%)                              | <0.001              |
| Intracranial bleeding                                 | 78 (0.7%)                                  | 35 (1.3%)                                      | 43 (0.5%)                               | <0.001              |
| Myocardial infarction                                 | 562 (4.7%)                                 | 196 (7.4%)                                     | 366 (3.9%)                              | <0.001              |
| Stroke                                                | 237 (2.0%)                                 | 80 (3.0%)                                      | 157 (1.7%)                              | <0.001              |
| Pulmonary embolism                                    | 195 (1.6%)                                 | 71 (2.7%)                                      | 124 (1.3%)                              | <0.001              |
| Transfusion of erythrocytes                           | 4175 (34.8%)                               | 1432 (54.1%)                                   | 2743 (29.4%)                            | <0.001              |

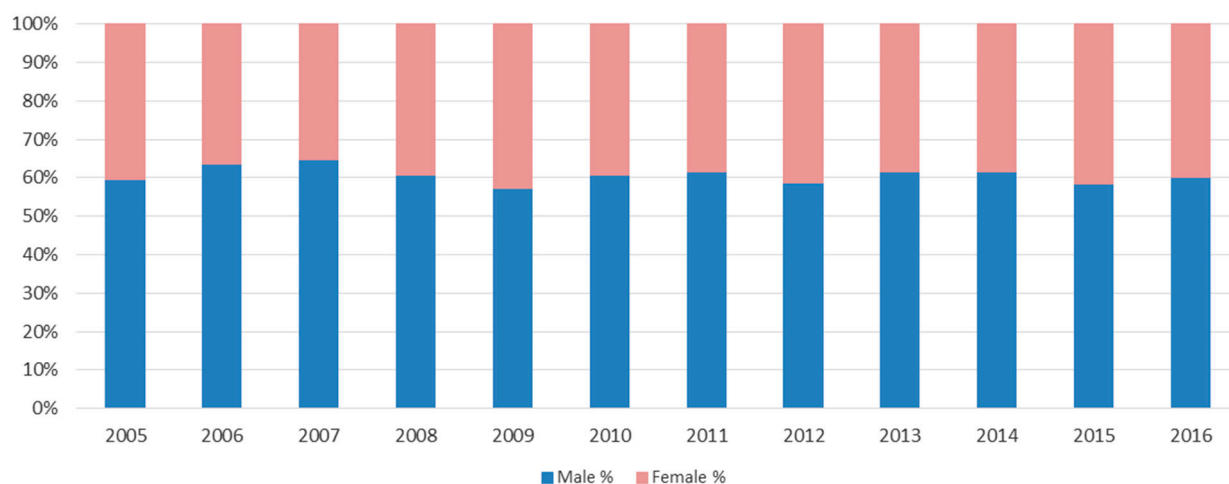

**Figure S1.** Time trends of sex distribution in AKI patients with concomitant psoriasis.

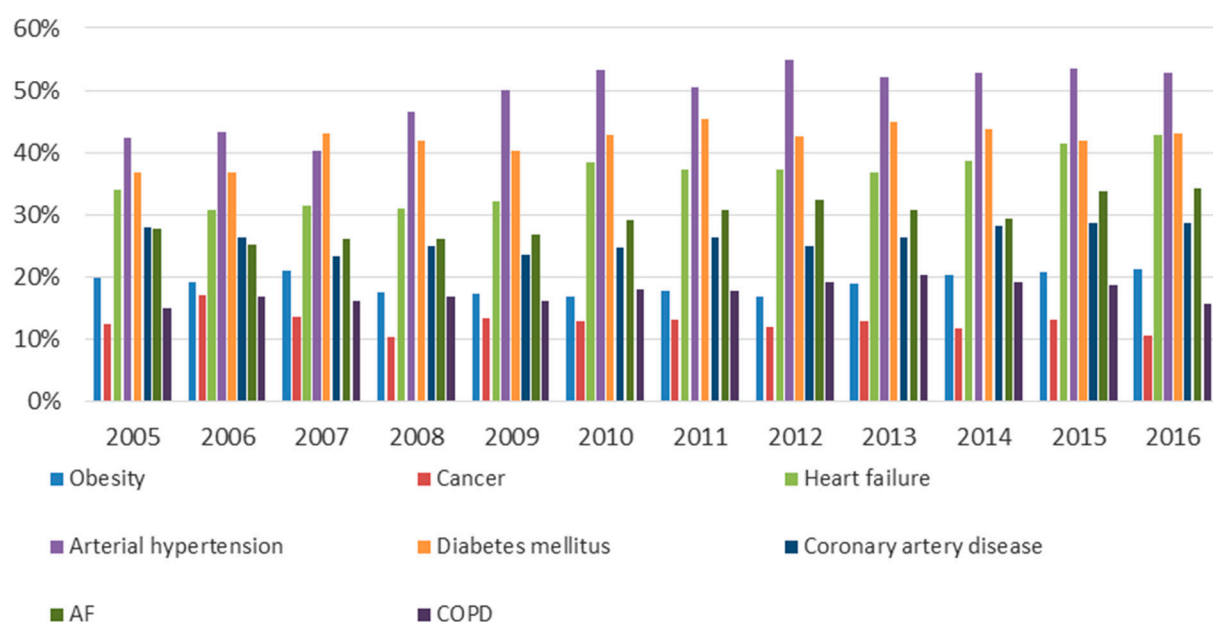

**Figure S2.** Time trends of comorbidities in patients hospitalized with AKI with concomitant psoriasis.
